# Supplementary material for: Sustainability assessment of biojet fuel produced from pyrolysis oil of woody biomass
Source: Royal Society of Chemistry journal article supplement (doi:10.1039/d3se00468f), 2023-01-01
Supplement: d3se00468f1.pdf [file d3se00468f1.pdf]

## **Sustainability assessment of biojet fuel produced from pyrolysis oil of woody biomass**

Eprillia Intan Fitriasaki<sup>a</sup>, Wangyun Won<sup>b</sup>, and J. Jay Liu<sup>a,\*</sup>

<sup>a</sup>*Department of Chemical Engineering, Pukyong National University, Busan 48513, Republic of Korea*

<sup>b</sup>*Department of Chemical Engineering (Integrated Engineering), Kyung Hee University, 1732 Deogyong-daero, Giheung-gu, Yongin-si, Gyeonggi-do, 17104, Republic of Korea*

Figure S1. Simplified Process flow diagram A100-A400

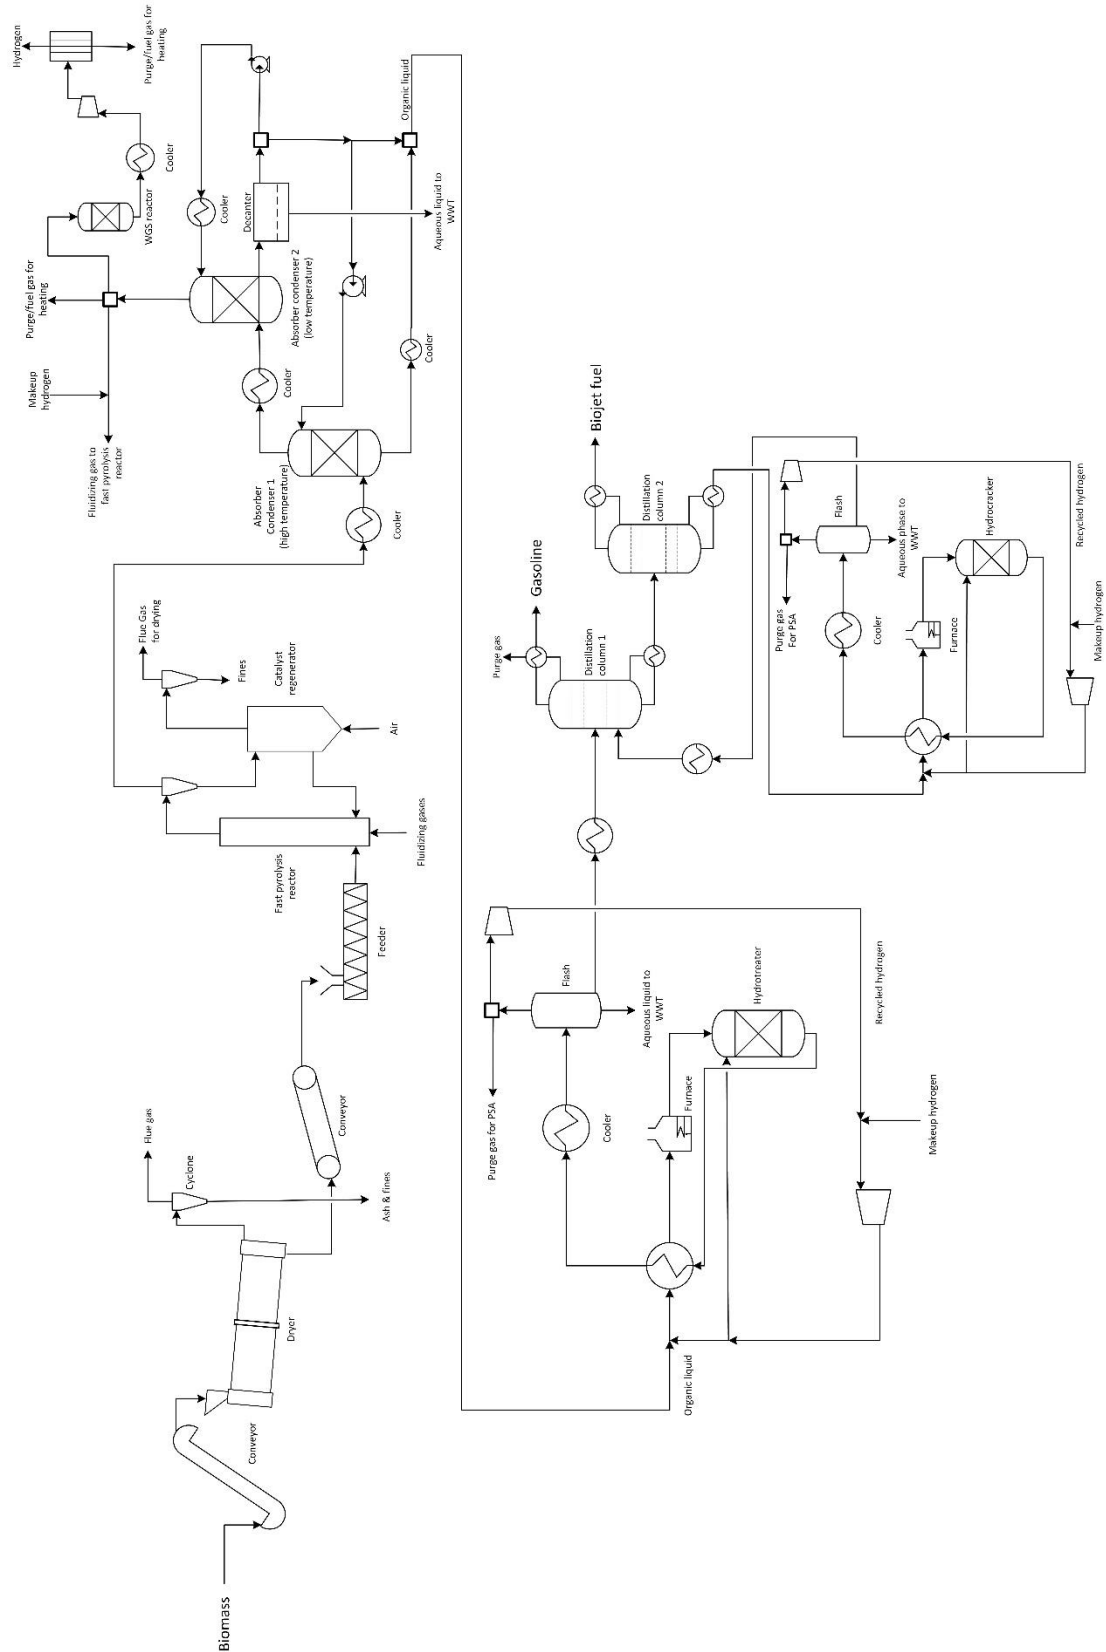

**Table S1. Product yield for biojet fuel range compared to renewable diesel**

| Hydrocarbon formula | Composition (wt%)            |               |
|---------------------|------------------------------|---------------|
|                     | Renewable diesel (NREL 2015) | Biojet fuel   |
| C10H8               | 1.97%                        | 2.50%         |
| C10H8O              | 0.01%                        | 0.00%         |
| C10H12              | 0.18%                        | 0.22%         |
| C10H18              | 0.05%                        | 0.05%         |
| C11H10-1            | 4.15%                        | 5.07%         |
| C11H20-N8           | 11.67%                       | 14.20%        |
| C12H10              | 0.48%                        | 0.57%         |
| C14H20-N35          | 10.85%                       | 10.41%        |
| C14H24-N5           | 7.17%                        | 4.59%         |
| C14H30-N26          | 34.28%                       | 41.79%        |
| C15H26-N4           | 6.88%                        | 6.51%         |
| C15H32-N10          | 17.63%                       | 14.02%        |
| C16H14-N14          | 0.91%                        | 0.00%         |
| C16H34              | 1.01%                        | 0.04%         |
| C18H28-X1           | 2.22%                        | 0.00%         |
| C21H34              | 0.55%                        | 0.00%         |
| <b>Total</b>        | <b>100.0%</b>                | <b>100.0%</b> |

**Table S2. Summary of equipment cost for main process area**

| Equipment                                                | Scaling exponential (n) | Purchased equipment cost (2021) | Installation factor (f) | Installed cost (2021)    |
|----------------------------------------------------------|-------------------------|---------------------------------|-------------------------|--------------------------|
| <b>A100: Feed Handling and drying</b>                    |                         |                                 |                         |                          |
| Blower                                                   | 0.78                    | \$ 219,299.96                   | 1.94                    | \$ 425,441.93            |
| Dryer                                                    | 0.8                     | \$ 139,371.69                   | 2.00                    | \$ 278,743.38            |
| <b>Total A100</b>                                        |                         | <b>\$ 358,671.66</b>            | <b>1.96</b>             | <b>\$ 704,185.31</b>     |
| <b>A200: Fast pyrolysis and vapor upgrading</b>          |                         |                                 |                         |                          |
| Fluidizing gas compressor                                | 0.9                     | \$ 4,654,405.46                 | 1.60                    | \$ 7,447,048.73          |
| Combustor air compressor                                 | 0.78                    | \$ 8,813,915.98                 | 1.60                    | \$ 14,102,265.56         |
| Fluidized bed reactor                                    | 0.5                     | \$ 10,471,399.40                | 4.01                    | \$ 41,990,311.58         |
| Char combustor                                           | 0.5                     | \$ 8,765,574.90                 | 3.97                    | \$ 34,799,332.37         |
| Catalyst cooler                                          | 0.8                     | \$ 5,045,241.31                 | 3.00                    | \$ 15,135,723.94         |
| Catalyst stripper                                        | 0.3                     | \$ 2,051,176.40                 | 3.00                    | \$ 6,153,529.19          |
| Heat exchanger network                                   |                         | \$ 3,517,160.33                 | 2.64                    | \$ 9,285,303.26          |
| <b>Total A200</b>                                        |                         | <b>\$ 43,318,873.77</b>         | <b>2.98</b>             | <b>\$ 128,913,514.63</b> |
| <b>A300: Pyrolysis Vapor Quench and Product Recovery</b> |                         |                                 |                         |                          |
| Heavy fraction condenser absorber                        | 0.6                     | \$ 1,477,707.88                 | 1.40                    | \$ 2,068,791.03          |
| Light fraction condenser absorber                        | 0.6                     | \$ 1,527,989.00                 | 1.33                    | \$ 2,032,225.37          |
| Vapor heat exchanger                                     | 0.6                     | \$ 933,125.53                   | 1.32                    | \$ 1,231,725.70          |
| Feed cooler                                              | 0.7                     | \$ 244,700.45                   | 2.03                    | \$ 496,741.92            |
| Feed exchanger                                           | 0.7                     | \$ 1,038,052.91                 | 1.52                    | \$ 1,577,840.42          |
| Liquid feed chiller                                      | 0.7                     | \$ 192,252.10                   | 2.33                    | \$ 447,947.39            |
| Heavy fraction heat exchanger                            | 0.6                     | \$ 47,745.95                    | 2.42                    | \$ 115,545.21            |
| Quench circulation chiller                               | 0.7                     | \$ 230,030.19                   | 4.63                    | \$ 1,065,039.78          |
| Bottoms pump                                             | 0.8                     | \$ 15,572.00                    | 4.38                    | \$ 68,205.36             |
| Circulation filter charge pump                           | 0.8                     | \$ 75,768.03                    | 4.61                    | \$ 349,290.60            |
| Aqueous filter charge pump                               | 0.8                     | \$ 21,328.05                    | 4.20                    | \$ 89,577.81             |
| Organic product pump                                     | 0.8                     | \$ 18,285.57                    | 4.63                    | \$ 84,662.17             |
| Quench recycle pump                                      | 0.8                     | \$ 23,202.60                    | 4.88                    | \$ 113,228.68            |
| Bottoms filter                                           | 0.8                     | \$ 39,049.16                    | 1.84                    | \$ 71,850.46             |

| Equipment                                           | Scaling exponential (n) | Purchased equipment cost (2021) | Installation factor (f) | Installed cost (2021)   |
|-----------------------------------------------------|-------------------------|---------------------------------|-------------------------|-------------------------|
| Bottoms decanter                                    | 0.7                     | \$ 444,668.17                   | 1.82                    | \$ 809,296.07           |
| Quench circulation filter                           | 0.8                     | \$ 369,978.88                   | 1.71                    | \$ 632,663.89           |
| Aqueous phase filter                                | 0.8                     | \$ 75,359.67                    | 1.77                    | \$ 133,386.61           |
| Organic product surge tank                          | 0.7                     | \$ 67,453.11                    | 3.24                    | \$ 218,548.08           |
| Circulation surge tank                              | 0.7                     | \$ 94,326.76                    | 3.24                    | \$ 305,618.71           |
| Heat exchanger network condensation and separation  |                         | \$ 199,323.82                   | 2.64                    | \$ 526,214.88           |
| Post-WGS heat exchanger                             | 0.6                     | \$ 208,360.68                   | 1.71                    | \$ 356,296.76           |
| Post-WGS Cooler                                     | 0.7                     | \$ 67,330.46                    | 4.05                    | \$ 272,688.38           |
| PSA compressor                                      | 0.9                     | \$ 4,768,672.13                 | 1.60                    | \$ 7,629,875.40         |
| PSA compressor                                      | 0.6                     | \$ 1,441,977.16                 | 1.80                    | \$ 2,595,558.88         |
| Compressor condensate pump                          | 0.8                     | \$ 14,438.91                    | 4.38                    | \$ 63,242.41            |
| High-temperature WGS                                | 0.6                     | \$ 720,704.96                   | 1.42                    | \$ 1,023,401.04         |
| PSA compressor suction KO                           | 0.7                     | \$ 67,755.55                    | 2.00                    | \$ 135,511.10           |
| PSA compressor disch KO                             | 0.7                     | \$ 79,211.90                    | 2.56                    | \$ 202,782.47           |
| Compressor condensate tank                          | 0.7                     | \$ 34,746.76                    | 3.24                    | \$ 112,579.49           |
| Heat exchanger network hydrogen recycle and WGS     |                         | \$ 619,123.90                   | 2.64                    | \$ 1,634,487.09         |
| <b>Total A300</b>                                   |                         | <b>\$ 15,158,242.22</b>         | <b>1.75</b>             | <b>\$ 26,464,823.17</b> |
| <b>A400: Hydroprocessing and product separation</b> |                         |                                 |                         |                         |
| Feed-effluent exchanger                             | 0.7                     | \$ 879,813.07                   | 2.23                    | \$ 1,961,983.15         |
| Feed furnace                                        | 0.6                     | \$ 410,207.13                   | 1.31                    | \$ 537,371.34           |
| HT product heat exchanger                           | 0.6                     | \$ 85,989.55                    | 1.93                    | \$ 165,959.82           |
| HT product cooler                                   | 0.7                     | \$ 128,605.23                   | 3.20                    | \$ 411,536.73           |
| Quench hydrogen stage 2 cooler                      | 0.7                     | \$ 40,074.94                    | 7.10                    | \$ 284,532.05           |
| Quench hydrogen stage 3 cooler                      | 0.7                     | \$ 40,074.94                    | 7.10                    | \$ 284,532.05           |
| Hydrogen makeup compressor                          | 0.64                    | \$ 4,520,407.94                 | 1.60                    | \$ 7,232,652.70         |
| Hydrogen recycle compressor                         | 0.9                     | \$ 2,628,660.21                 | 1.60                    | \$ 4,205,856.34         |
| HT feed pump                                        | 0.8                     | \$ 113,534.97                   | 3.58                    | \$ 406,455.18           |
| Hydrotreater, 2000 psi                              | 1                       | \$ 9,689,829.43                 | 1.43                    | \$ 13,856,456.08        |
| Vapor KO drum                                       | 0.7                     | \$ 66,147.20                    | 3.45                    | \$ 228,207.84           |

| Equipment                                 | Scaling exponential (n) | Purchased equipment cost (2021) | Installation factor (f) | Installed cost (2021) |
|-------------------------------------------|-------------------------|---------------------------------|-------------------------|-----------------------|
| HP HT effluent flash: 3 phase             | 0.7                     | \$ 1,011,517.93                 | 2.05                    | \$ 2,073,611.75       |
| LP HT effluent flash: 3 phase             | 0.7                     | \$ 52,338.25                    | 4.99                    | \$ 261,167.87         |
| Heat exchanger network hydrotreating      |                         | \$ 301,869.33                   | 2.64                    | \$ 796,935.03         |
| Gasoline column                           | 0.7                     | \$ 635,154.43                   | 1.69                    | \$ 1,073,410.99       |
| Biojet fuel column                        | 0.7                     | \$ 393,485.31                   | 1.91                    | \$ 751,556.94         |
| Condenser (Gasoline column)               | 0.7                     | \$ 44,587.79                    | 4.58                    | \$ 204,212.09         |
| Reboiler (Gasoline column)                | 0.7                     | \$ 69,737.41                    | 2.83                    | \$ 197,356.88         |
| Condenser (Biojet fuel column)            | 0.7                     | \$ 19,478.59                    | 6.66                    | \$ 129,727.39         |
| Reboiler (Biojet fuel column)             | 0.7                     | \$ 39,134.18                    | 2.83                    | \$ 110,749.72         |
| Gasoline product cooler                   | 0.7                     | \$ 27,039.50                    | 4.04                    | \$ 109,239.59         |
| Biojet fuel product cooler                | 0.7                     | \$ 16,224.26                    | 5.63                    | \$ 91,342.58          |
| Overhead vapor cooler                     | 0.7                     | \$ 13,789.44                    | 6.30                    | \$ 86,873.44          |
| Reflux pump (Gasoline column)             | 0.8                     | \$ 46,072.10                    | 4.31                    | \$ 198,570.75         |
| Reflux pump (Biojet fuel pump)            | 0.8                     | \$ 10,744.16                    | 3.96                    | \$ 42,546.89          |
| Overhead accumulator (Gasoline column)    | 0.7                     | \$ 179,303.08                   | 4.01                    | \$ 719,005.33         |
| Overhead accumulator (Biojet fuel column) | 0.7                     | \$ 45,231.69                    | 4.34                    | \$ 196,305.53         |
| Heat exchanger network hydroprocessing    |                         | \$ 636,628.98                   | 2.64                    | \$ 1,680,700.52       |
| Feed-effluent exchanger                   | 0.7                     | \$ 202,748.18                   | 3.37                    | \$ 683,261.37         |
| Feed furnace                              | 0.6                     | \$ 159,782.68                   | 1.52                    | \$ 242,869.67         |
| HC product heat exchanger                 | 0.6                     | \$ 34,817.84                    | 2.05                    | \$ 71,376.56          |
| HC product cooler                         | 0.7                     | \$ 38,306.31                    | 3.23                    | \$ 123,729.38         |
| Quench hydrogen stage 2 cooler            | 0.7                     | \$ 13,587.35                    | 7.10                    | \$ 96,470.16          |
| Quench hydrogen stage 3 cooler            | 0.7                     | \$ 13,587.35                    | 7.10                    | \$ 96,470.16          |
| Hydrogen makeup compressor                | 0.64                    | \$ 2,057,225.13                 | 1.60                    | \$ 3,291,560.20       |
| Hydrogen recycle compressor               | 0.9                     | \$ 567,908.98                   | 1.60                    | \$ 908,654.37         |
| HC feed pump                              | 0.8                     | \$ 36,791.34                    | 3.58                    | \$ 131,712.99         |
| Hydrocracker                              | 1                       | \$ 1,663,296.62                 | 1.97                    | \$ 3,276,694.33       |

| Equipment                            | Scaling exponential (n) | Purchased equipment cost (2021) | Installation factor (f) | Installed cost (2021)   |
|--------------------------------------|-------------------------|---------------------------------|-------------------------|-------------------------|
| Vapor KO drum                        | 0.7                     | \$ 19,110.65                    | 3.45                    | \$ 65,931.73            |
| Hp effluent flash: 3 phase           | 0.7                     | \$ 166,809.80                   | 2.15                    | \$ 358,641.06           |
| LP effluent flash                    | 0.7                     | \$ 11,686.32                    | 8.99                    | \$ 105,059.98           |
| Heat exchanger network hydrocracking |                         | \$ 112,758.67                   | 2.64                    | \$ 297,682.88           |
| <b>Total A400</b>                    |                         | <b>\$ 27,244,098.21</b>         | <b>1.76</b>             | <b>\$ 48,048,971.45</b> |

**Table S3.** Summary of annual operating cost

| <b>Material</b>                            | <b>Quoted price</b>    | <b>Base Year</b> | <b>Cost (MM\$/year)</b> |
|--------------------------------------------|------------------------|------------------|-------------------------|
| <b>Feedstock, Catalyst &amp; Chemicals</b> |                        |                  |                         |
| Wood chips                                 | \$ 80.00/ton           | 2011             | \$ 52.56                |
| Zeolite catalyst                           | \$ 9.75/lb             | 2011             | \$ 26.44                |
| Natural gas                                | \$ 0.12/lb             | 2011             | \$ 0.05                 |
| Caustic soda 50%                           | \$ 0.08/lb             | 2011             | \$ 0.18                 |
| Boiler chemical                            | \$ 75.00/lb            | 2011             | \$ 0.00                 |
| Cooling tower chemicals                    | \$ 33.84/ton cool/year | 2011             | \$ 0.16                 |
| Net water makeup                           | \$ 0.31/ton            | 2011             | \$ 0.05                 |
| Diesel fuel                                | \$ 0.40/lb             | 2011             | \$ 0.22                 |
| <b>Waste Streams</b>                       |                        |                  |                         |
| CFP purge                                  | \$ 0.03/lb             | 2011             | \$ 0.53                 |
| Quench filter solids                       | \$ 0.03/lb             | 2011             | \$ 0.01                 |
| WWT cost                                   | \$ 0.003/lb            | 2011             | \$ 0.51                 |
| <b>Subtotal</b>                            |                        |                  | <b>\$ 80.72</b>         |
| <b>Coproduct credits</b>                   |                        |                  |                         |
| Electricity                                | \$ 0.06/kWh            | 2011             | \$ (2.36)               |
| <b>Subtotal</b>                            |                        |                  | <b>\$ (2.36)</b>        |
| <b>Total</b>                               |                        |                  | <b>\$ 78.36</b>         |



**Table S4.** Percentages for calculating total capital investment

| <b>Cost distribution</b>                 | <b>Percentages</b> | <b>Cost</b>     |
|------------------------------------------|--------------------|-----------------|
| <b>Direct cost</b>                       |                    |                 |
| Warehouse                                | 4% of ISBL         | \$8,165,259.78  |
| Site Development                         | 9% of ISBL         | \$18,371,834.51 |
| Additional piping                        | 5% of ISBL         | \$10,206,574.73 |
| <b>Indirect cost</b>                     |                    |                 |
| Portable expenses                        | 10% of TDC         | \$24,087,516.36 |
| Field expenses                           | 10% of TDC         | \$24,087,516.36 |
| Home office and construction fee         | 20% of TDC         | \$48,175,032.72 |
| Project contingency                      | 10% of TDC         | \$24,087,516.36 |
| Other costs (start-up, permits,<br>etc.) | 10% of TDC         | \$24,087,516.36 |
| Land                                     | 6% of IC           | \$12,247,889.67 |
| Working capital                          | 20% of ISBL        | \$19,270,013.09 |

**Table S5.** Jet Fuel price in the market December 16<sup>th</sup>, 2022 (Source: IATA)<sup>1</sup>

| <b>Area</b>             | <b>Share in world index</b> | <b>\$/L</b> | <b>Vs. 1 year ago</b> |
|-------------------------|-----------------------------|-------------|-----------------------|
| Asia & Oceania          | 22%                         | 0.88        | 36.4%                 |
| Europe & CIS            | 28%                         | 0.91        | 39.4%                 |
| Middle East & Africa    | 7%                          | 0.86        | 35.6%                 |
| North America           | 39%                         | 0.92        | 39.2%                 |
| Latin & Central America | 4%                          | 0.94        | 40.3%                 |
| <b>Jet Fuel Price</b>   | 100%                        | 0.91        | 38.4%                 |

**Table S6.** List of Ecoinvent databases selected for the feedstock assumptions

| <b>Feedstock</b>                  | <b>Inventory</b>                                                                                                                                | <b>Composition</b> |
|-----------------------------------|-------------------------------------------------------------------------------------------------------------------------------------------------|--------------------|
| Pulpwood                          | Wood chips, dry, measured as dry mass {GLO}  wood chips production, pulpwood, at forest   APOS, S                                               | 45%                |
| Woody residues                    | Shavings, hardwood, measured as dry mass {RoW}  market for shavings, hardwood, measured as dry mass   Cut-off, S                                | 32%                |
| Switchgrass                       | Switchgrass, ground and stored, 2022/ton/RNA                                                                                                    | 3%                 |
| Construction and demolition waste | Wood chips, from post-consumer wood, measured as dry mass {RER}  market for wood chips, from post-consumer wood, measured as dry mass   APOS, S | 20%                |

**Table S7.** LCA results in the WTP stage according to CML-IA baseline method

| <b>Impact category</b>          | <b>Unit</b> | <b>Biojet fuel</b> | <b>Kerosene/Jet A1</b> |
|---------------------------------|-------------|--------------------|------------------------|
| Abiotic depletion (fossil fuel) | kJ          | -2941.387617       | 1163.609206            |
| Global warming (GWP100a)        | g CO2 eq    | 4.322208645        | 9.363303738            |
| Ozone layer depletion (ODP)     | g CFC-11 eq | 4.12531E-06        | 6.0876E-08             |
| Human toxicity                  | g 1,4-DB eq | 35.50076402        | 0.584699533            |
| Photochemical oxidation         | g C2H4 eq   | -0.590155327       | 0.006255909            |
| Acidification                   | g SO2 eq    | 0.02374189         | 0.063307762            |
| Eutrophication                  | g PO4--- eq | 0.097128397        | 0.003364805            |

## References:

- 1 IATA - Fuel Price Monitor, <https://www.iata.org/en/publications/economics/fuel-monitor/>, (accessed 5 March 2023).
